# Supplementary material
Source: HighWire-hosted journal article supplement (https://dmd.aspetjournals.org/highwire/filestream/80448/field_highwire_adjunct_files/0/854_supp_table.pdf)
Supplement: 854_supp_table.pdf [file 854_supp_table.pdf]

**Combined oral contraceptives as victims of drug interactions**

**Authors:** Li Li, Xinning Yang, Doanh Tran, Shirley K. Seo, Yanhui Lu

**Affiliations:** LL, XY, DT, SKS, YL: Office of Clinical Pharmacology, Office of Translational Sciences, Center for Drug Evaluation and Research, Food and Drug Administration, Silver Spring, Maryland, USA

**Supplemental Table 1. AUC geometric mean ratios and 90% confidence intervals of CYP3A substrates in the presence of CYP3A inducers shown in Figure 6.**

| CYP3A Probes | Corresponding COCs | CYP3A inducers | Classification | GMRs  | 90% CIs   |      | References               |
|--------------|--------------------|----------------|----------------|-------|-----------|------|--------------------------|
|              |                    |                |                |       |           |      |                          |
| Midazolam    | DRSP/EE            | Rifampin       | strong         | 0.137 | 0.12      | 0.15 | (Wiesinger et al., 2020) |
| Midazolam    | LNG/EE             | Rifampin       | strong         | 0.137 | 0.14      | 0.15 | (Wiesinger et al., 2020) |
| Quetiapine   | LNG/EE             | Phenytoin      | strong         | 0.19  | 0.15      | 0.23 | (Wong et al., 2001)      |
| Midazolam    | LNG/EE             | Carbamazepine  | strong         | 0.211 | 0.18<br>3 | 0.24 | (Lutz et al., 2018)      |
| Midazolam    | LNG/EE             | Carbamazepine  | strong         | 0.211 | 0.18<br>3 | 0.24 | (Lutz et al., 2018)      |
| Midazolam    | NET/EE             | Carbamazepine  | strong         | 0.211 | 0.18<br>3 | 0.24 | (Lutz et al., 2018)      |
| Midazolam    | NET/EE             | Rifampin       | strong         | 0.137 | 0.12<br>4 | 0.15 | (Wiesinger et al., 2020) |
| Midazolam    | NET/EE             | Rifampin       | strong         | 0.137 | 0.12<br>4 | 0.15 | (Wiesinger et al., 2020) |
| Midazolam    | NET/EE             | Rifampin       | strong         | 0.137 | 0.12<br>4 | 0.15 | (Wiesinger et al., 2020) |
| Simvastatin  | NGM/EE             | Efavirenz      | moderate       | 0.42  | 0.32      | 0.61 | (Gerber et al., 2005)    |
| Simvastatin  | LNG/EE             | Efavirenz      | moderate       | 0.42  | 0.32      | 0.61 | (Gerber et al., 2005)    |

|              |         |                 |               |                   |      |      |                                          |
|--------------|---------|-----------------|---------------|-------------------|------|------|------------------------------------------|
| Simvastatin  | LNG/EE  | Eslicarbazepine | moderate      | 0.5               | 0.4  | 0.64 | (Falcao et al., 2013)                    |
| Midazolam    | NET/EE  | Rifampin        | moderate      | 0.24              | 0.22 | 0.27 | (van Dyk et al., 2019)                   |
| Midazolam    | NET/EE  | St. John's wort | moderate      | 0.34              | 0.31 | 0.39 | (Xie et al., 2005)                       |
| Midazolam    | NET/EE  | Rifabutin       | moderate      | 0.31              | 0.27 | 0.35 | (Lutz et al., 2018)                      |
| Midazolam    | NET/EE  | Rifabutin       | moderate      | 0.31              | 0.27 | 0.35 | (Lutz et al., 2018)                      |
| Sildenafil   | NET/EE  | Bosentan        | moderate      | 0.37              | 0.32 | 0.43 | (Burgess et al., 2008)                   |
| Sildenafil   | NET/EE  | Etravirine      | moderate      | 0.43              | 0.36 | 0.51 | (NDA022187, 2008)                        |
| Midazolam    | NET/EE  | Elagolix        | moderate      | 0.46              | 0.41 | 0.5  | (Polepally et al., 2020)                 |
| Itraconazole | NET/EE  | Nevirapine      | Weak/moderate | 0.38 <sup>1</sup> | n/a  | n/a  | (Jaruratanasirikul and Sriwiriyan, 2007) |
| Indinavir    | NET/EE  | Nevirapine      | Weak/moderate | 0.69              | 0.61 | 0.78 | (VIRAMUNE, 2022)                         |
| Midazolam    | LNG/EE  | Elagolix        | Weak/Moderate | 0.65              | 0.58 | 0.72 | (Polepally et al., 2020)                 |
| Midazolam    | LNG/EE  | Elagolix        | Weak/Moderate | 0.46              | 0.41 | 0.5  | (Polepally et al., 2020)                 |
| Midazolam    | DRSP/EE | Rifampin        | weak          | 0.54              | 0.49 | 0.59 | (Polepally et al., 2020)                 |
| Midazolam    | NGM/EE  | Elagolix        | weak          | 0.65              | 0.58 | 0.72 | (Polepally et al., 2020)                 |
| Midazolam    | LNG/EE  | Rifampin        | weak          | 0.54              | 0.49 | 0.59 | (Wiesinger et al., 2020)                 |
| Midazolam    | LNG/EE  | Lersivirine     | weak          | 0.64              | 0.52 | 0.77 | (Davis et al., 2012)                     |
| Midazolam    | NET/EE  | Elagolix        | weak          | 0.65              | 0.58 | 0.72 | (Polepally et al., 2020)                 |
| Midazolam    | NET/EE  | Rifampin        | weak          | 0.54              | 0.49 | 0.59 | (Wiesinger et al., 2020)                 |
| Midazolam    | NET/EE  | St. John's wort | weak          | 0.65              | 0.49 | 0.81 | (Hall et al., 2003)                      |

<sup>1</sup>Data presented as arithmetic mean ratio.

Abbreviations: AUC = area under the concentration-time curve; COCs = Combined oral contraceptives; CIs = confidence intervals; CYP = cytochrome P450; DRSP = drospirenone; EE = ethinyl estradiol; GMRs = geometric mean ratios; LNG = levonorgestrel; n/a = not available; NET = norethindrone; NGM = norgestimate

## References:

- Burgess G, Hoogkamer H, Collings L, and Dingemans J (2008) Mutual pharmacokinetic interactions between steady-state bosentan and sildenafil. *Eur J Clin Pharmacol* **64**:43-50.
- Davis J, Langdon G, Layton G, Chong CL, Ndongo MN, and Vourvahis M (2012) The effect of lersivirine, a next-generation NNRTI, on the pharmacokinetics of midazolam and oral contraceptives in healthy subjects. *Eur J Clin Pharmacol* **68**:1567-1572.
- Falcao A, Pinto R, Nunes T, and Soares-da-Silva P (2013) Effect of repeated administration of eslicarbazepine acetate on the pharmacokinetics of simvastatin in healthy subjects. *Epilepsy Res* **106**:244-249.
- Gerber JG, Rosenkranz SL, Fichtenbaum CJ, Vega JM, Yang A, Alston BL, Brobst SW, Segal Y, Aberg JA, and Team ACTGA (2005) Effect of efavirenz on the pharmacokinetics of simvastatin, atorvastatin, and pravastatin: results of AIDS Clinical Trials Group 5108 Study. *J Acquir Immune Defic Syndr* **39**:307-312.
- Hall SD, Wang Z, Huang SM, Hamman MA, Vasavada N, Adigun AQ, Hilligoss JK, Miller M, and Gorski JC (2003) The interaction between St John's wort and an oral contraceptive. *Clin Pharmacol Ther* **74**:525-535.
- Jaruratanasirikul S and Sriwiriyan S (2007) Pharmacokinetic study of the interaction between itraconazole and nevirapine. *Eur J Clin Pharmacol* **63**:451-456.
- Lutz JD, Kirby BJ, Wang L, Song Q, Ling J, Massetto B, Worth A, Kearney BP, and Mathias A (2018) Cytochrome P450 3A Induction Predicts P-glycoprotein Induction; Part 2: Prediction of Decreased Substrate Exposure After Rifabutin or Carbamazepine. *Clin Pharmacol Ther* **104**:1191-1198.
- NDA021911 (2008) Drug approval package: BANZEL (clinical pharmacology biopharmaceutics review) <[https://www.accessdata.fda.gov/drugsatfda\\_docs/nda/2008/021911Orig1s000ClinPharmR\\_P1.pdf](https://www.accessdata.fda.gov/drugsatfda_docs/nda/2008/021911Orig1s000ClinPharmR_P1.pdf)>.
- NDA022187 (2008) Drug approval package: INTELENCE (clinical pharmacology biopharmaceutics review) <[https://www.accessdata.fda.gov/drugsatfda\\_docs/nda/2008/022187s000\\_ClinPharmR\\_P1.pdf](https://www.accessdata.fda.gov/drugsatfda_docs/nda/2008/022187s000_ClinPharmR_P1.pdf)>.
- Polepally AR, Ng JW, Salem AH, Dufek MB, Parikh A, Carter DC, Kamradt K, Mostafa NM, and Shebley M (2020) Assessment of Clinical Drug-Drug Interactions of Elagolix, a Gonadotropin-Releasing Hormone Receptor Antagonist. *J Clin Pharmacol* **60**:1606-1616.
- Prueksaritanont T, Vega JM, Zhao J, Gagliano K, Kuznetsova O, Musser B, Amin RD, Liu L, Roadcap BA, Dilzer S, Lasseter KC, and Rogers JD (2001) Interactions between simvastatin and troglitazone or pioglitazone in healthy subjects. *J Clin Pharmacol* **41**:573-581.
- van Dyk M, Miners JO, Marshall JC, Wood LS, Hopkins A, Sorch MJ, and Rowland A (2019) Identification of the caffeine to trimethyluric acid ratio as a dietary biomarker to characterise variability in cytochrome P450 3A activity. *Eur J Clin Pharmacol* **75**:1211-1218.
- VIRAMUNE (2022) VIRAMUNE Prescribing Information <[https://www.accessdata.fda.gov/drugsatfda\\_docs/label/2022/020636s052,020933s043lbl.pdf](https://www.accessdata.fda.gov/drugsatfda_docs/label/2022/020636s052,020933s043lbl.pdf)>.

- Wiesinger H, Klein S, Rottmann A, Nowotny B, Riecke K, Gashaw I, Brudny-Kloppel M, Fricke R, Hochel J, and Friedrich C (2020) The Effects of Weak and Strong CYP3A Induction by Rifampicin on the Pharmacokinetics of Five Progestins and Ethinylestradiol Compared to Midazolam. *Clin Pharmacol Ther* **108**:798-807.
- Wong YW, Yeh C, and Thyrum PT (2001) The effects of concomitant phenytoin administration on the steady-state pharmacokinetics of quetiapine. *J Clin Psychopharmacol* **21**:89-93.
- Xie RJ, Tan LH, Polasek EC, Hong C, Teillol-Foo M, Gordi T, Sharma A, Nickens DJ, Arakawa T, Knuth DW, and Antal EJ (2005) CYP3A and P-glycoprotein activity induction with St. John's Wort in healthy volunteers from 6 ethnic populations. *Journal of Clinical Pharmacology* **45**:352-356.
- Zaccara G, Gangemi PF, Bendoni L, Menge GP, Schwabe S, and Monza GC (1993) Influence of single and repeated doses of oxcarbazepine on the pharmacokinetic profile of felodipine. *Ther Drug Monit* **15**:39-42.
